# Supplementary material
Source: PubMed Central journal article supplement (PMC125029)

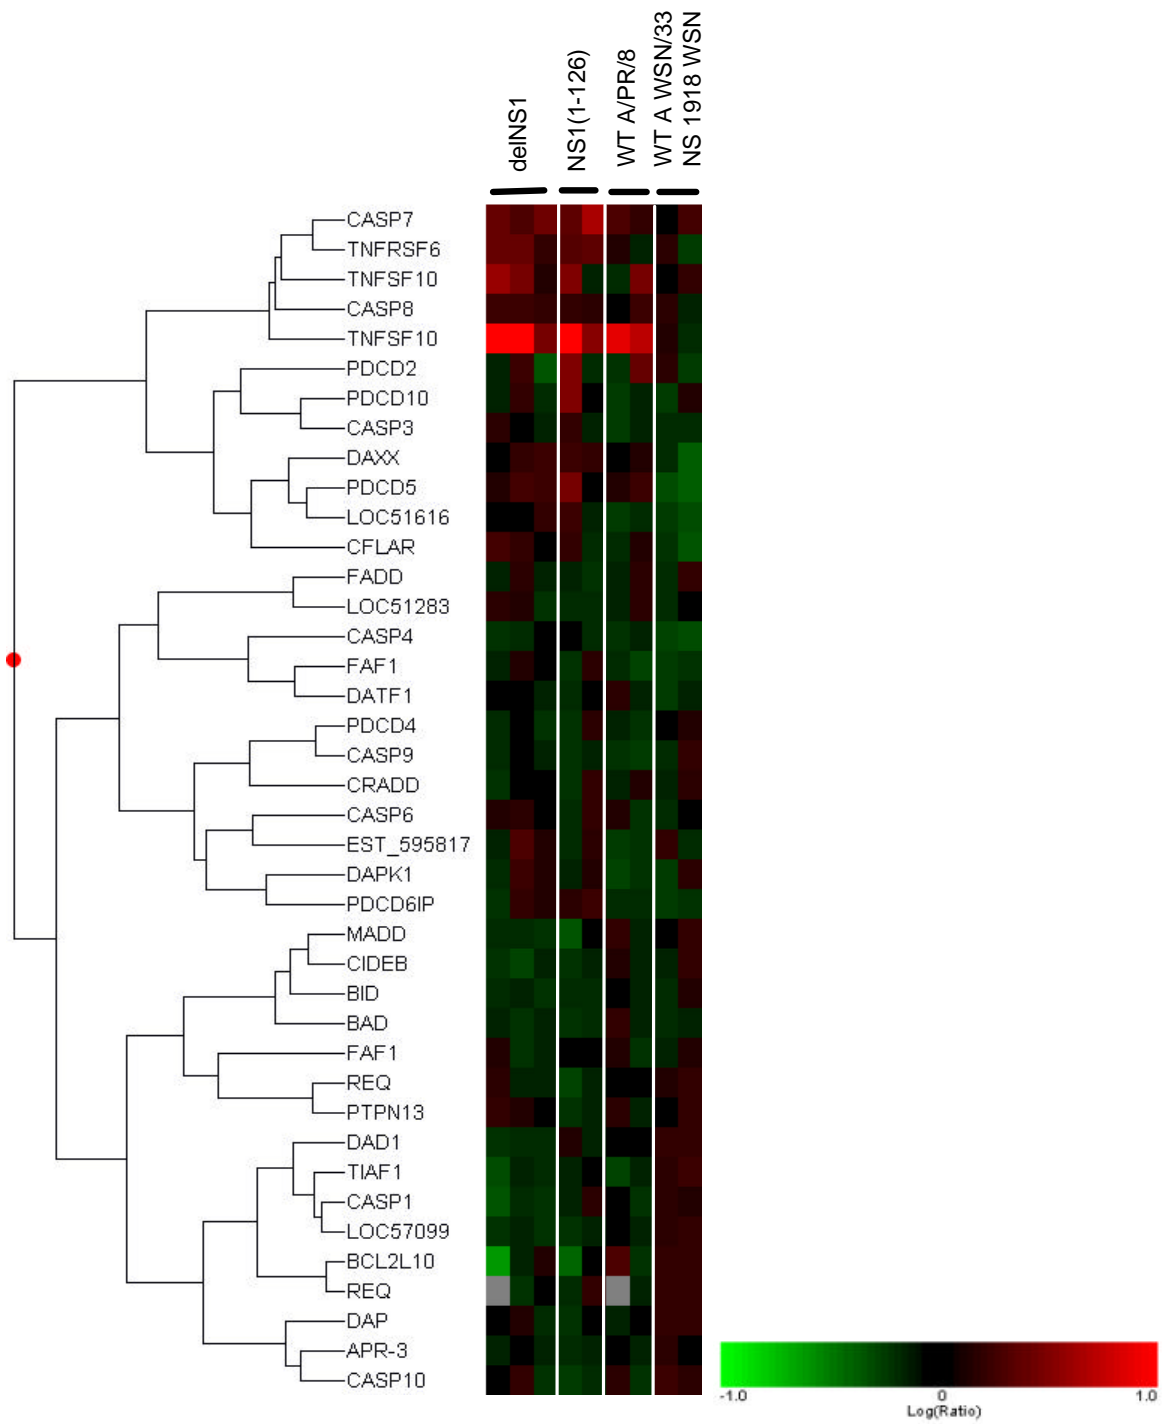

Supplement: pnas_112338099_17.pdf [file pnas_112338099_17.pdf]

A

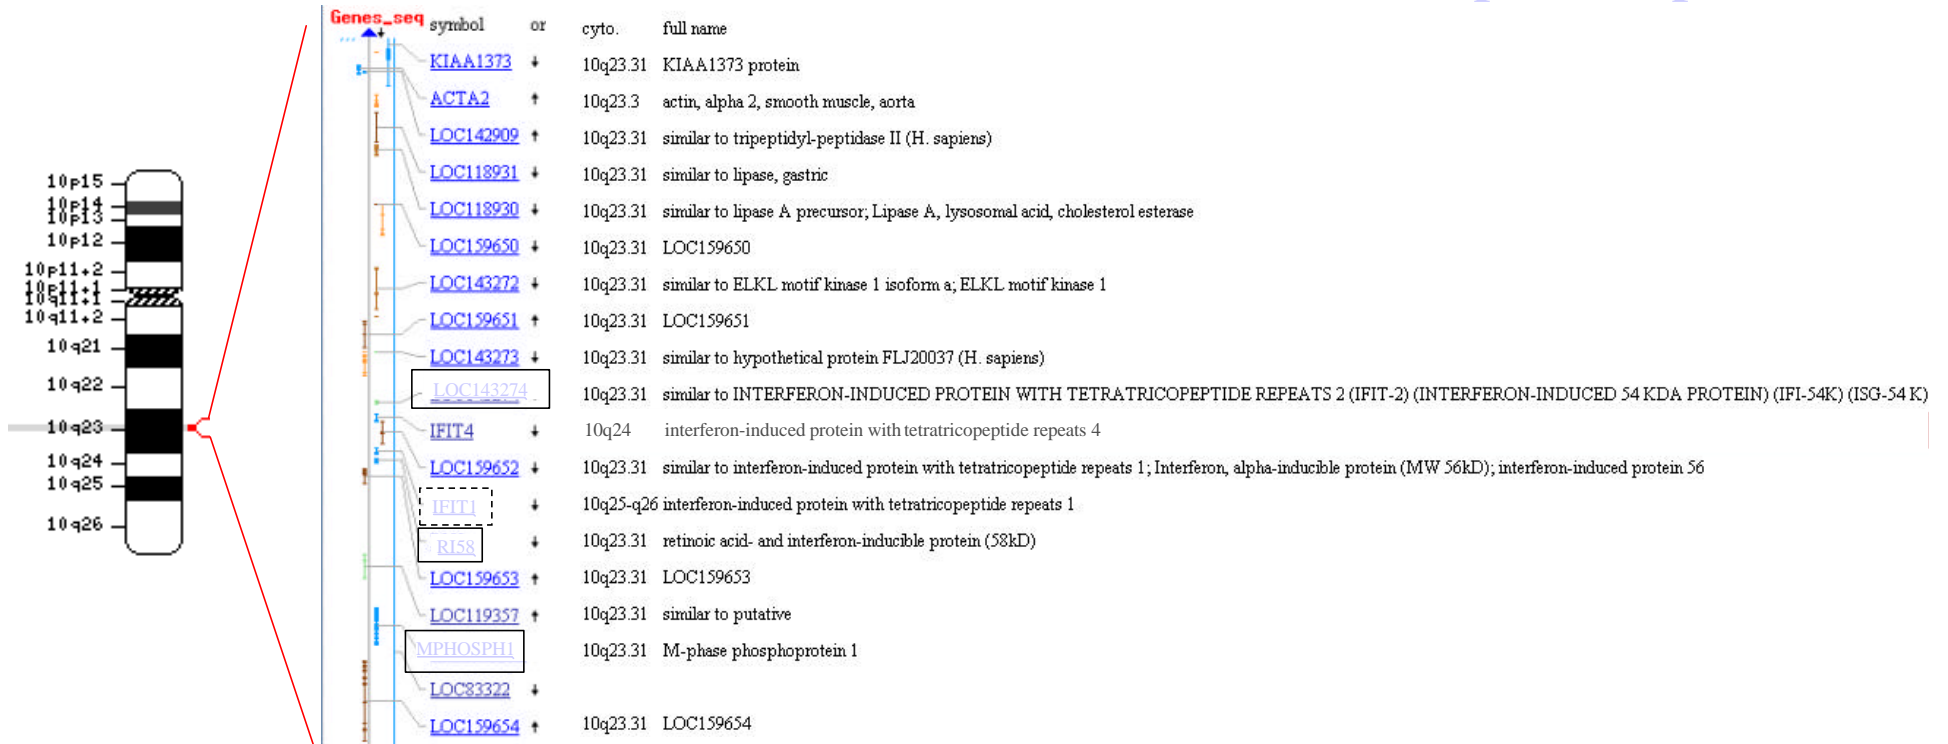

B

[link to map in Map View](#)

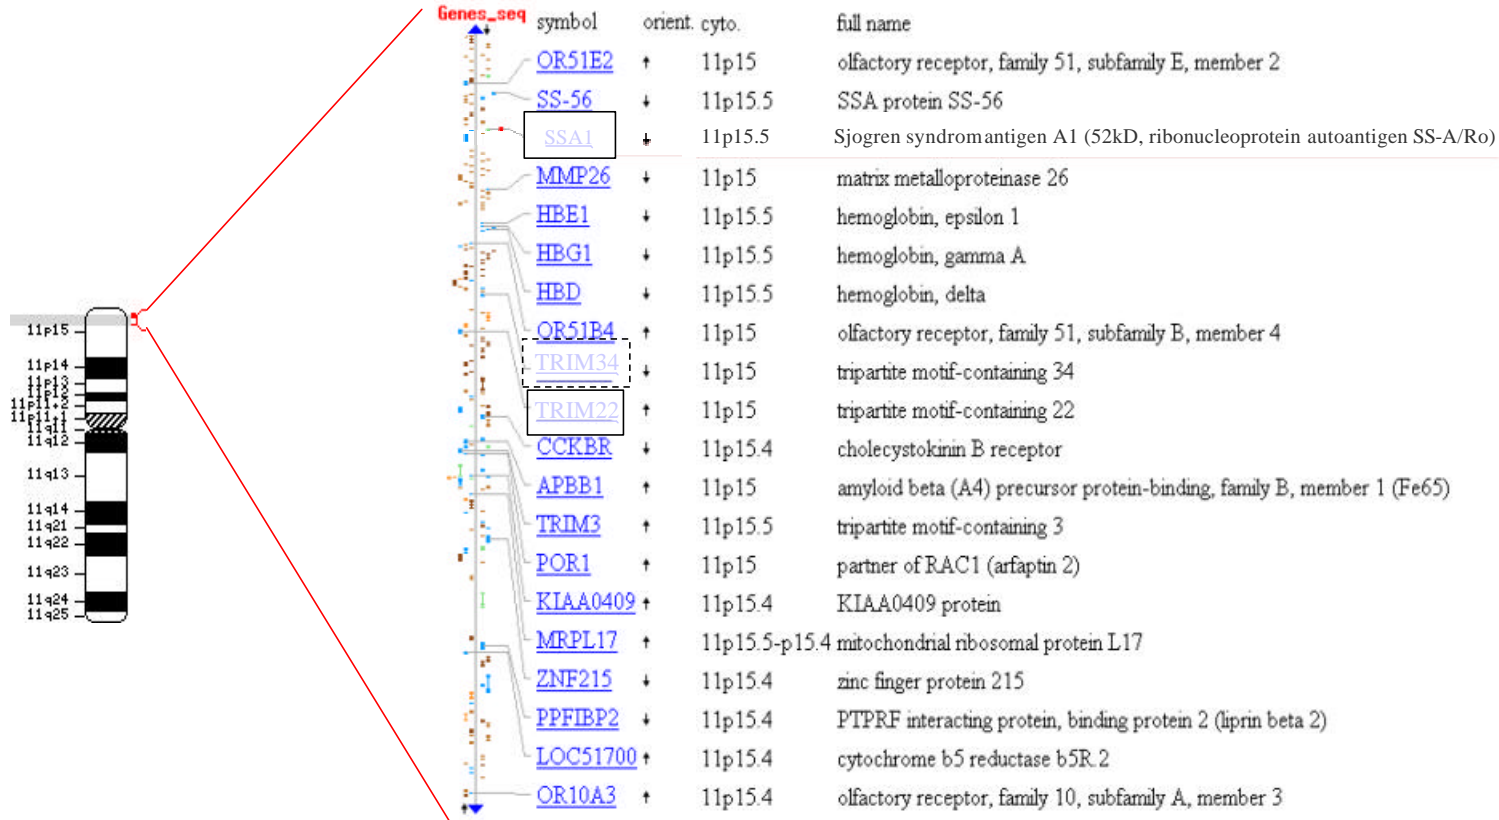

Supplement: pnas_112338099_18.pdf [file pnas_112338099_18.pdf]

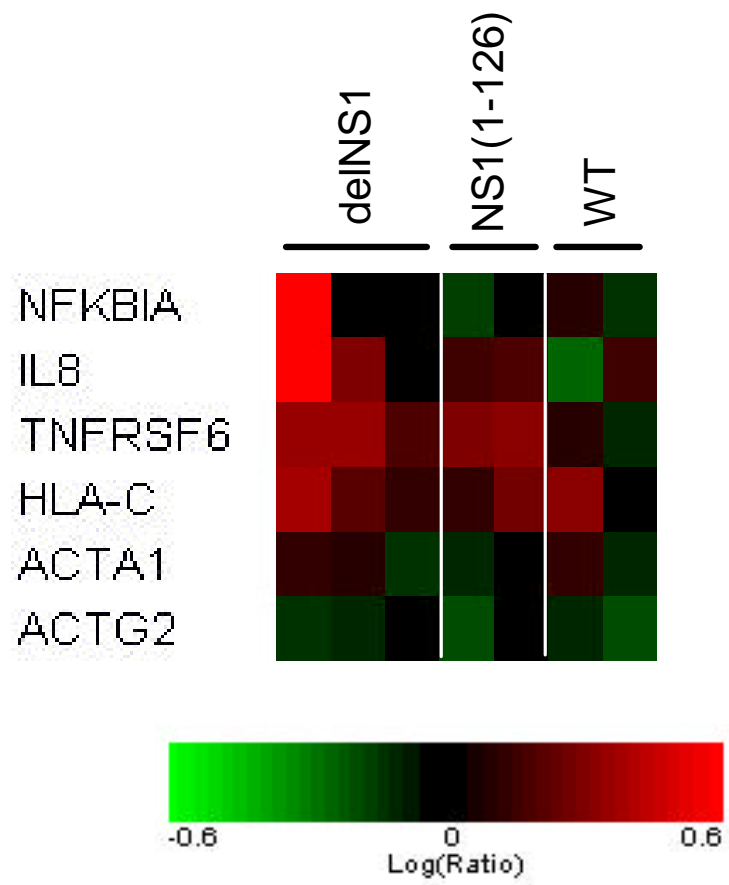

Supplement: pnas_112338099_21.pdf [file pnas_112338099_21.pdf]
